# Supplementary material
Source: PubMed Central journal article supplement (PMC2996118)

## Data supplements:

### Figure S1. AML1-ETO mutant proteins localize in nuclei of circulating hemocytes.

UAS constructs of mutant forms of AML1-ETO (indicated on top of the panels) were over-expressed in hematopoietic cells of *Drosophila* with use of *hml<sup>A</sup>-Gal4*. Immunostaining of circulated hemocytes with anti-AML1 antibody has revealed nuclear localization of the AML1-ETO mutant proteins.

### Figure S2. Expression of excess Runx partner proteins Brother (Bro) or Big Brother (Bgb) suppresses AML1-ETO-induced hemocyte proliferation.

(A) *UAS-Bro* or *-Bgb* (on X axis) were co-expressed with AML1-ETO in hemocytes (*hml<sup>A</sup>-Gal4, UAS-GFP; UAS-AML1-ETO: hml>AML1-ETO*). Number of hemocytes in AML1-ETO background was significantly reduced by loss of both *Bro* and *Bgb* (n=10, P<0.001), while their ectopic expression in wild type hemocytes (*hml*, B) did not significantly affect hemocyte proliferation.

### Figure S3. *EcR-B1* is required for AML1-ETO-induced hemocyte proliferation.

Upper panels show hemocyte concentrations (GFP<sup>+</sup> cells) in larvae of *hml<sup>A</sup>-Gal4, UAS-GFP; UAS-AML1-ETO (hml>AML1-ETO)* backgrounds. Lower panels show hemocyte density in larvae of wild type *hml<sup>A</sup>-Gal4, UAS-GFP (hml)* backgrounds. Single copy of *EcR* alleles indicated on the top of each panel. Alleles of *EcR-B1* (*Q50st, KG04522, dsRNA*) and dsRNA and dominant negative (DN) alleles of *EcR-A* significantly suppress and enhance AML1-ETO-mediated proliferation of hemocytes, correspondingly, if compared with *w<sup>1118</sup>* control background. Single copy loss of both isoforms (*M554fs*, loss of ligand binding) enhances AML1-ETO-mediated proliferation of hemocytes. Alleles of *EcR-B1* and *EcR-A* do not significantly affect hemocyte number (GFP<sup>+</sup> cells) in wild type backgrounds.

### Figure S4. *EcR-B1* function is not required for *hop<sup>Tum-I</sup>*-induced blood phenotype.

*hop<sup>Tum-I</sup>* mutation causes robust enhancement of lamellocyte differentiation and increased number of hemocytes. Single copy loss of the *EcRB1* did not affect the aberrant differentiation of lamellocytes (A), and the proliferation of hemocytes (B) in *hop<sup>Tum-I</sup>* mutant.

Lamellocytes in the blood samples were revealed after immunostaining with L1 antibody (red). Genotypes are indicated on the top of the corresponding panels.

**Figure S5. Functions of several nuclear hormone receptors are required for AML1-ETO-induced hemocyte proliferation.**

Each nuclear receptor (on X axis) was inactivated with corresponding *UAS-RNAi* in hemocytes expressing AML1-ETO (*hml<sup>A</sup>-Gal4, UAS-GFP; UAS-AML1-ETO: hml>AML1-ETO*). Number of hemocytes in AML1-ETO background was significantly reduced by dsRNA alleles of *E75B, E78C, err, Hr96 and Hnf4* (n=10, \* P<0.001). Number of hemocytes in AML1-ETO background was not significantly affected by inactivation of *DHR3, DHR38* but was increased by dsRNA alleles of *DHR39* and *DHR4*.

**Figure S6. Increased ROS level caused proliferation of circulating hemocytes.**

High ROS level generated by the disruption of complex I protein (ND75) of the mitochondrial electron transport chain in circulating hemocytes (*hml<sup>A</sup>-Gal4, UAS-GFP; UAS-dsND75: hml/dsND75*) causes significant increase in number these cells.

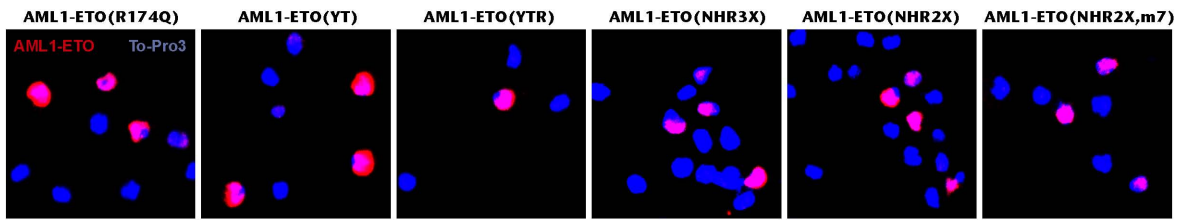

Figure S1

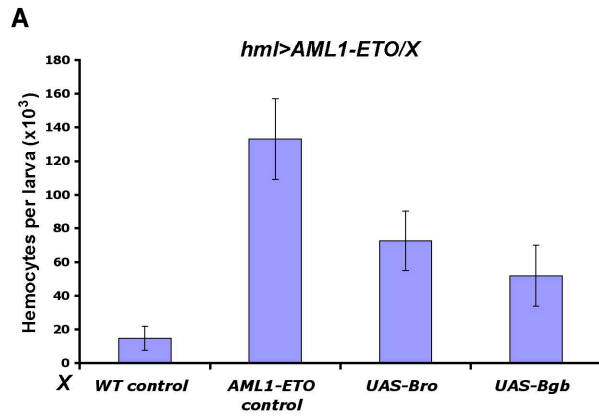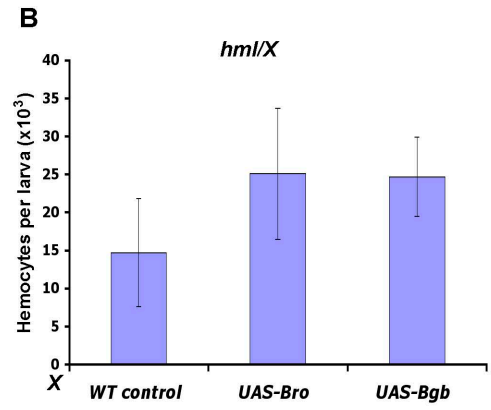

Figure S2

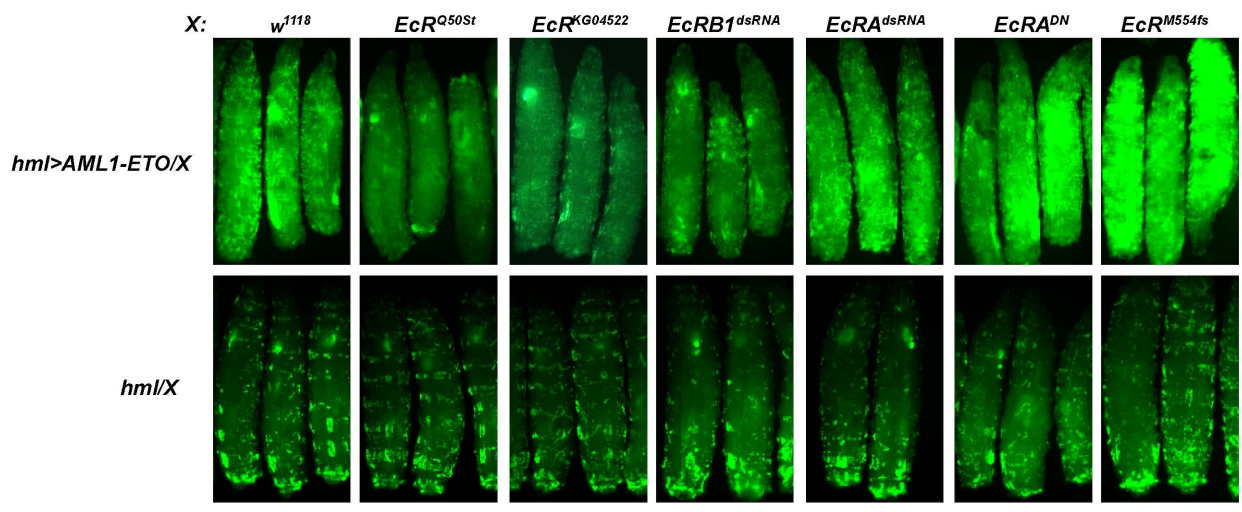

Figure S3

**A**

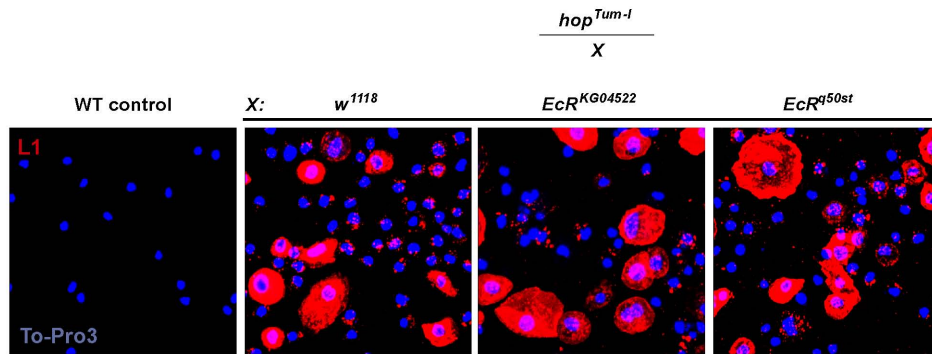

**B**

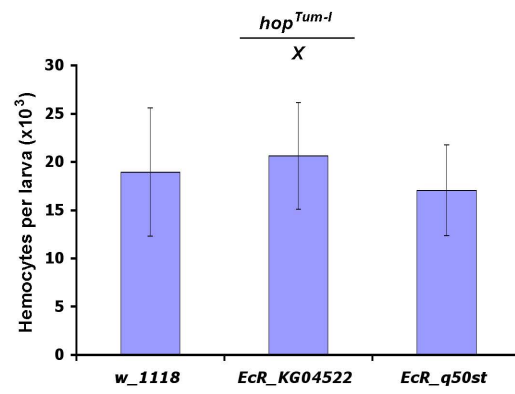

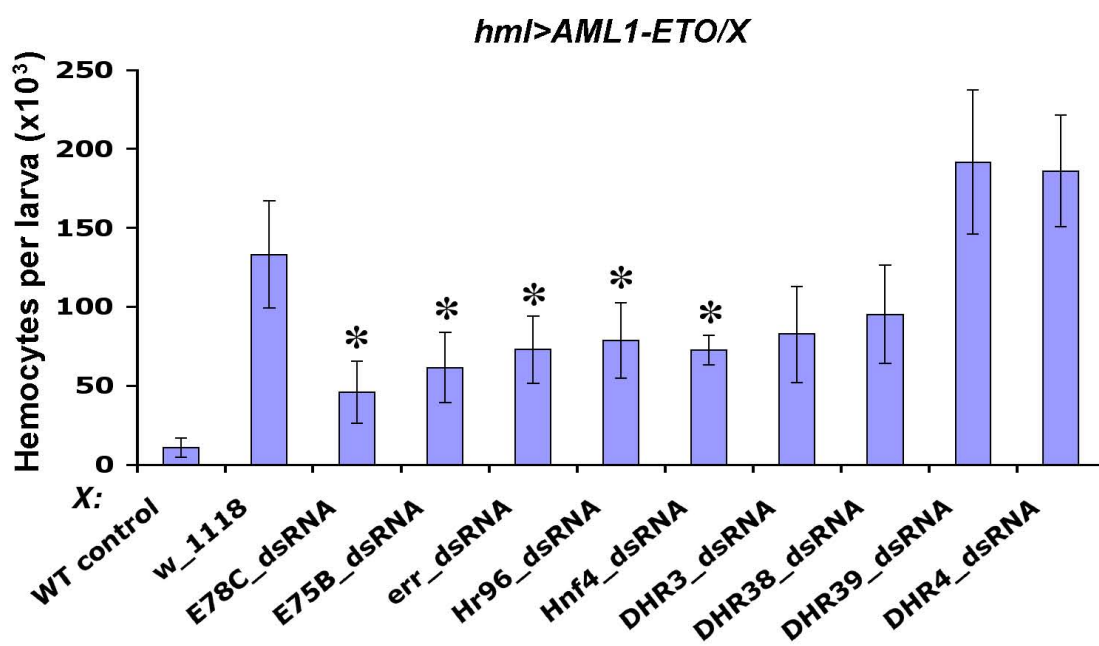

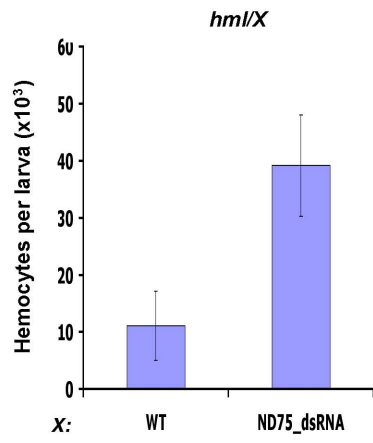

Supplement: blood-2010-03-276998_1.pdf [file blood-2010-03-276998_1.pdf]
